# Supplementary material
Source: MDPI journal article supplement (https://www.mdpi.com/2076-3417/13/11/6414)
Supplement: s1 [file s1]

## Supplementary Materials for:

### Pharmaceuticals Removal (%) from Wastewater with Microalgae: A Pilot Study

André Pereira <sup>1</sup>, Etiele Greque de Moraes <sup>2,3</sup>, Liliana Silva <sup>1</sup>, Angelina Pena <sup>1</sup>, Andreia Freitas <sup>4,5</sup>,  
Margarida Ribau Teixeira <sup>6</sup>, João Varela <sup>2,7</sup>, Luísa Barreira <sup>2,7\*</sup>

<sup>1</sup> LAQV, REQUIMTE, Laboratory of Bromatology and Pharmacognosy, Faculty of Pharmacy, University of Coimbra, Polo III, Azinhaga de Santa Comba, 3000-548 Coimbra, Portugal; andrepereira@ff.uc.pt (A.P.); ljgsilva@ff.uc.pt (L.S.); apena@ff.uc.pt (A.P.)

<sup>2</sup> CCMAR—Centre of Marine Sciences, University of Algarve, Campus de Gambelas, 8005-139 Faro, Portugal; etiele@gmail.com (E.G.d.M.); jvarela@ualg.pt (J.V.)

<sup>3</sup> Group of Environmental Engineering and Microbiology, Department of Civil and Environmental Engineering, Universitat Politècnica de Catalunya-Barcelona Tech, 08034 Barcelona, Spain

<sup>4</sup> INIAV—National Institute for Agricultural and Veterinary Research, I.P., Rua dos Lágidos, Lugar da Madalena, 4485-655 Vila do Conde, Portugal; andreia.freitas@iniav.pt

<sup>5</sup> REQUIMTE/LAQV, R. D. Manuel II, Apartado 55142, 4051-401 Porto, Portugal

<sup>6</sup> CENSE—Centre for Research on the Environment and Sustainability & Change—Global Change and Sustainability Institute, Faculty of Sciences and Technology, University of Algarve, Campus de Gambelas, 8005-139 Faro, Portugal; mribau@ualg.pt

<sup>7</sup> GreenCoLab—Green Ocean Technologies and Products Collaborative Laboratory, CCMAR, University of Algarve, 8005-139 Faro, Portugal

\* Correspondence: lbarreir@ualg.pt

Table S1. Pharmaceutical compounds included in the scope of the method, mass detection parameters, and limits of detection (LOD) for each compound in water.

| Compound               | Molecular Formula                                                            | Molecular Weight | [M+H] <sup>+</sup> | LoD (ng/L) | RT (min) |
|------------------------|------------------------------------------------------------------------------|------------------|--------------------|------------|----------|
| <b>Analgesic</b>       |                                                                              |                  |                    |            |          |
| Acetaminophen          | C <sub>8</sub> H <sub>9</sub> NO <sub>2</sub>                                | 151.0633         | 152.0706           | 1.89       | 2.21     |
| <b>Antibiotics</b>     |                                                                              |                  |                    |            |          |
| Amoxicillin            | C <sub>16</sub> H <sub>19</sub> N <sub>3</sub> O <sub>5</sub> S              | 365.1045         | 366.1118           | 0.11       | 6.91     |
| Azithromycin           | C <sub>38</sub> H <sub>72</sub> N <sub>2</sub> O <sub>12</sub>               | 748.5085         | 749.5158           | 0.01       | 5.04     |
| Benzylpenicillin       | C <sub>16</sub> H <sub>18</sub> N <sub>2</sub> O <sub>4</sub> S              | 334.0987         | 335.1060           | 0.75       | 4.49     |
| Ceftiofur              | C <sub>19</sub> H <sub>17</sub> N <sub>5</sub> O <sub>7</sub> S <sub>3</sub> | 523.0290         | 524.0363           | 0.03       | 5.85     |
| Cephalexin             | C <sub>16</sub> H <sub>17</sub> N <sub>3</sub> O <sub>4</sub> S              | 347.0939         | 348.1013           | 0.04       | 4.85     |
| Chlortetracycline      | C <sub>22</sub> H <sub>23</sub> ClN <sub>2</sub> O <sub>8</sub>              | 478.1142         | 479.1216           | 1.73       | 4.78     |
| Cinoxacin              | C <sub>12</sub> H <sub>10</sub> N <sub>2</sub> O <sub>5</sub>                | 262.0589         | 263.0663           | 0.03       | 5.25     |
| Ciprofloxacin          | C <sub>17</sub> H <sub>18</sub> FN <sub>3</sub> O <sub>3</sub>               | 331.1332         | 332.1405           | 3.47       | 4.47     |
| Danofloxacin           | C <sub>19</sub> H <sub>20</sub> FN <sub>3</sub> O <sub>3</sub>               | 357.1488         | 358.1562           | 3.25       | 4.59     |
| Doxycyclin             | C <sub>22</sub> H <sub>24</sub> N <sub>2</sub> O <sub>8</sub>                | 444.1532         | 445.1605           | 0.28       | 5.23     |
| Enoxacin               | C <sub>15</sub> H <sub>17</sub> FN <sub>4</sub> O <sub>3</sub>               | 320.1284         | 321.1358           | 3.33       | 4.33     |
| Enrofloxacin           | C <sub>19</sub> H <sub>22</sub> FN <sub>3</sub> O <sub>3</sub>               | 359.1645         | 360.1718           | 2.27       | 4.66     |
| epi-Chlortetracycline  | C <sub>22</sub> H <sub>23</sub> ClN <sub>2</sub> O <sub>8</sub>              | 478.1142         | 479.1216           | 1.00       | 4.54     |
| epi-Tetracycline       | C <sub>22</sub> H <sub>24</sub> N <sub>2</sub> O <sub>8</sub>                | 444.1532         | 445.1605           | 0.40       | 4.27     |
| Flumequine             | C <sub>14</sub> H <sub>12</sub> FNO <sub>3</sub>                             | 261.0801         | 262.0874           | 0.01       | 6.18     |
| Marbofloxacin          | C <sub>17</sub> H <sub>19</sub> FN <sub>4</sub> O <sub>4</sub>               | 362.1390         | 363.1463           | 2.51       | 4.29     |
| Nalidixic acid         | C <sub>12</sub> H <sub>12</sub> N <sub>2</sub> O <sub>3</sub>                | 232.0847         | 233.0921           | 0.92       | 6.07     |
| Norfloxacin            | C <sub>16</sub> H <sub>18</sub> FN <sub>3</sub> O <sub>3</sub>               | 319.1332         | 320.1405           | 1.81       | 4.41     |
| Ofloxacin              | C <sub>18</sub> H <sub>20</sub> FN <sub>3</sub> O <sub>4</sub>               | 361.1437         | 362.1511           | 0.99       | 4.43     |
| Oxolinic acid          | C <sub>13</sub> H <sub>11</sub> NO <sub>5</sub>                              | 261.0637         | 262.0710           | 3.08       | 5.50     |
| Oxytetracycline        | C <sub>22</sub> H <sub>24</sub> N <sub>2</sub> O <sub>9</sub>                | 460.1481         | 461.1555           | 0.24       | 4.40     |
| Spiramycin             | C <sub>43</sub> H <sub>74</sub> N <sub>2</sub> O <sub>14</sub>               | 842.5140         | 843.5213           | 0.01       | 5.02     |
| Sulfachloropyridazine  | C <sub>10</sub> H <sub>9</sub> ClN <sub>4</sub> O <sub>2</sub> S             | 284.0134         | 285.0208           | 0.43       | 4.95     |
| Sulfadiazine           | C <sub>10</sub> H <sub>10</sub> N <sub>4</sub> O <sub>2</sub> S              | 250.0524         | 251.0597           | 0.01       | 3.81     |
| Sulfadimethoxine       | C <sub>12</sub> H <sub>14</sub> N <sub>4</sub> O <sub>4</sub> S              | 310.0735         | 311.0809           | 0.30       | 5.70     |
| Sulfadimidin           | C <sub>12</sub> H <sub>14</sub> N <sub>4</sub> O <sub>2</sub> S              | 278.0837         | 279.091            | 0.14       | 4.51     |
| Sulfadoxine            | C <sub>12</sub> H <sub>14</sub> N <sub>4</sub> O <sub>4</sub> S              | 310.0735         | 311.0809           | 0.03       | 4.94     |
| Sulfamethizole         | C <sub>9</sub> H <sub>10</sub> N <sub>4</sub> O <sub>2</sub> S <sub>2</sub>  | 270.0245         | 271.0318           | 0.32       | 4.52     |
| Sulfamethoxazole       | C <sub>10</sub> H <sub>11</sub> N <sub>3</sub> O <sub>3</sub> S              | 253.0521         | 254.0594           | 0.03       | 5.12     |
| Sulfapyridine          | C <sub>11</sub> H <sub>11</sub> N <sub>3</sub> O <sub>2</sub> S              | 249.0572         | 250.0645           | 0.46       | 3.80     |
| Sulfaquinoxaline       | C <sub>14</sub> H <sub>12</sub> N <sub>4</sub> O <sub>2</sub> S              | 300.0681         | 301.0754           | 0.03       | 5.71     |
| Sulfathiazole          | C <sub>9</sub> H <sub>9</sub> N <sub>3</sub> O <sub>2</sub> S <sub>2</sub>   | 255.0136         | 256.0209           | 0.56       | 3.65     |
| Sulfisomidine          | C <sub>12</sub> H <sub>14</sub> N <sub>4</sub> O <sub>2</sub> S              | 278.0837         | 279.091            | 0.10       | 3.42     |
| Sulfisoxazole          | C <sub>11</sub> H <sub>13</sub> N <sub>3</sub> O <sub>3</sub> S              | 267.0677         | 268.075            | 0.02       | 5.04     |
| Tetracycline           | C <sub>22</sub> H <sub>24</sub> N <sub>2</sub> O <sub>8</sub>                | 444.1532         | 445.1605           | 0.48       | 4.57     |
| Tilmicosin             | C <sub>46</sub> H <sub>80</sub> N <sub>2</sub> O <sub>13</sub>               | 868.5660         | 869.5733           | 0.01       | 5.40     |
| Trimethoprim           | C <sub>14</sub> H <sub>18</sub> N <sub>4</sub> O <sub>3</sub>                | 290.1378         | 291.1452           | 0.80       | 4.24     |
| Tylosin A              | C <sub>46</sub> H <sub>77</sub> NO <sub>17</sub>                             | 915.5191         | 916.5264           | 0.36       | 5.90     |
| <b>Anticonvulsants</b> |                                                                              |                  |                    |            |          |

|                          |                                                                               |          |          |      |      |
|--------------------------|-------------------------------------------------------------------------------|----------|----------|------|------|
| Carbamazepine            | C <sub>15</sub> H <sub>12</sub> N <sub>2</sub> O                              | 237.1022 | 237.1022 | 0.01 | 6.08 |
| Gabapentin               | C <sub>9</sub> H <sub>17</sub> NO <sub>2</sub>                                | 172.1332 | 172.1332 | 0.81 | 3.61 |
| Topiramate               | C <sub>12</sub> H <sub>21</sub> NO <sub>8</sub> S                             | 340.1061 | 340.1061 | 0.03 | 5.82 |
| <b>Antidepressants</b>   |                                                                               |          |          |      |      |
| Alpha-Hydroxyalprazolam  | C <sub>17</sub> H <sub>13</sub> ClN <sub>4</sub> O                            | 324.0777 | 325.0851 | 0.02 | 6.12 |
| Fluoxetine               | C <sub>17</sub> H <sub>18</sub> F <sub>3</sub> NO                             | 309.1340 | 310.1413 | 0.01 | 4.88 |
| Lorazepam                | C <sub>15</sub> H <sub>10</sub> Cl <sub>2</sub> N <sub>2</sub> O <sub>2</sub> | 320.0119 | 321.0192 | 2.98 | 4.53 |
| Sertraline               | C <sub>17</sub> H <sub>17</sub> Cl <sub>2</sub> N                             | 305.0738 | 306.0811 | 0.03 | 6.13 |
| Venlafaxine              | C <sub>17</sub> H <sub>27</sub> NO <sub>2</sub>                               | 277.2041 | 278.2115 | 0.02 | 5.24 |
| <b>Antihypertensives</b> |                                                                               |          |          |      |      |
| Furosemide               | C <sub>12</sub> H <sub>11</sub> ClN <sub>2</sub> O <sub>5</sub> S             | 331.015  | 331.015  | 0.62 | 6.04 |
| Indapamide               | C <sub>16</sub> H <sub>16</sub> ClN <sub>3</sub> O <sub>3</sub> S             | 366.0674 | 366.0674 | 0.03 | 6.27 |
| Irbesartan               | C <sub>25</sub> H <sub>28</sub> N <sub>6</sub> O                              | 429.2397 | 429.2397 | 0.03 | 6.31 |
| Losartan                 | C <sub>22</sub> H <sub>23</sub> ClN <sub>6</sub> O                            | 423.1695 | 423.1695 | 0.05 | 5.77 |
| <b>β-Blockers</b>        |                                                                               |          |          |      |      |
| Atenolol                 | C <sub>14</sub> H <sub>22</sub> N <sub>2</sub> O <sub>3</sub>                 | 266.1630 | 267.1703 | 0.01 | 3.47 |
| Bisoprolol               | C <sub>18</sub> H <sub>31</sub> NO <sub>4</sub>                               | 325.2253 | 326.2326 | 0.14 | 5.29 |
| Carvedilol               | C <sub>24</sub> H <sub>26</sub> N <sub>2</sub> O <sub>4</sub>                 | 406.1892 | 407.1965 | 0.83 | 5.87 |
| Propranolol              | C <sub>16</sub> H <sub>21</sub> NO <sub>2</sub>                               | 259.1572 | 260.1645 | 0.06 | 4.39 |
| <b>Lipid regulators</b>  |                                                                               |          |          |      |      |
| Atorvastatin             | C <sub>33</sub> H <sub>35</sub> FN <sub>2</sub> O <sub>5</sub>                | 559.2603 | 559.2603 | 8.92 | 8.46 |
| Bezafibrate              | C <sub>19</sub> H <sub>20</sub> ClNO <sub>4</sub>                             | 362.1154 | 362.1154 | 0.07 | 6.91 |
| Fenofibrate              | C <sub>20</sub> H <sub>21</sub> ClO <sub>4</sub>                              | 361.1201 | 361.1201 | 0.02 | 9.41 |
| Gemfibrozil              | C <sub>15</sub> H <sub>22</sub> O <sub>3</sub>                                | 251.1642 | 251.1642 | 0.21 | 4.99 |
| Simvastatin              | C <sub>25</sub> H <sub>38</sub> O <sub>5</sub>                                | 419.2792 | 419.2792 | 2.80 | 6.20 |
| <b>Anti-inflammatory</b> |                                                                               |          |          |      |      |
| Diclofenac               | C <sub>14</sub> H <sub>11</sub> Cl <sub>2</sub> NO <sub>2</sub>               | 295.0166 | 296.024  | 0.02 | 7.70 |
| Ibuprofen                | C <sub>13</sub> H <sub>18</sub> O <sub>2</sub>                                | 206.1306 | 207.138  | 2.72 | 6.22 |
| Nimesulide               | C <sub>13</sub> H <sub>12</sub> N <sub>2</sub> O <sub>5</sub> S               | 308.0466 | 309.054  | 0.03 | 7.23 |

Table S2. Pharmaceuticals occurrence and Removal (%) in experience 1 (a) and 2 (b) in the microalgae system.

(a)

| Collection Date                | 07-28  | 08-02  | 08-09   | 08-16   | 08-23  | 08-30   | 07-30  | 08-03  | 08-17  | 08-31  | 08-24  | 07-30  | 08-03  | 08-10  | 08-17  | 08-24  | 08-31  |
|--------------------------------|--------|--------|---------|---------|--------|---------|--------|--------|--------|--------|--------|--------|--------|--------|--------|--------|--------|
| Entrance / Line (Out)          | E      | E      | E       | E       | E      | E       | L1     | L1     | L1     | L1     | L1     | L2     | L2     | L2     | L2     | L2     | L2     |
| Experiment                     | 1      | 1      | 1       | 1       | 1      | 1       | 1      | 1      | 1      | 1      | 1      | 1      | 1      | 1      | 1      | 1      | 1      |
| Alpha-Hydroxyalprazolam (ng/L) | 0.00   | 0.00   | 45.09   | 42.17   | 0.00   | 44.11   | 0.00   | 0.00   | 0.00   | 0.00   | 0.00   | 0.00   | 0.00   | 0.00   | 0.00   | 0.00   | 0.00   |
| Removal (%)                    |        |        |         |         |        |         |        |        |        | 100.00 | 100.00 |        |        |        | 100.00 | 100.00 | 100.00 |
| Atenolol (ng/L)                | 158.78 | 152.41 | 230.04  | 187.01  | 153.40 | 225.81  | 148.26 | 0.00   | 0.00   | 0.00   | 0.00   | 157.23 | 150.18 | 147.16 | 147.47 | 146.87 | 146.95 |
| Removal (%)                    |        |        |         |         |        |         | 6.63   | 100.00 | 100.00 | 100.00 | 100.00 | 0.97   | 1.46   | 36.03  | 21.14  | 4.26   | 34.92  |
| Azithromycin (ng/L)            | 0.00   | 0.00   | 0.00    | 0.00    | 0.00   | 0.00    | 0.00   | 0.00   | 0.00   | 0.00   | 0.00   | 0.00   | 0.00   | 0.00   | 0.00   | 0.00   | 0.00   |
| Removal (%)                    |        |        |         |         |        |         |        |        |        |        |        |        |        |        |        |        |        |
| Bezafibrate (ng/L)             | 127.76 | 76.33  | 552.51  | 350.84  | 116.82 | 472.87  | 58.74  | 0.00   | 149.86 | 0.00   | 63.63  | 99.59  | 78.98  | 0.00   | 76.75  | 61.64  | 0.00   |
| Removal (%)                    |        |        |         |         |        |         | 54.02  | 100.00 | 57.29  | 100.00 | 45.53  | 22.05  | -3.48  | 100.00 | 78.12  | 47.24  | 100.00 |
| Bisoprolol (ng/L)              | 0.00   | 93.52  | 393.13  | 125.81  | 0.00   | 324.72  | 0.00   | 0.00   | 86.04  | 49.25  | 0.00   | 0.00   | 0.00   | 0.00   | 0.00   | 0.00   | 0.00   |
| Removal (%)                    |        |        |         |         |        |         |        | 100.00 | 31.61  | 84.83  |        |        | 100.00 | 100.00 | 100.00 |        | 100.00 |
| Carbamazepine (ng/L)           | 98.24  | 112.31 | 1063.15 | 1321.77 | 174.63 | 1623.63 | 88.03  | 37.34  | 382.52 | 80.08  | 33.09  | 37.37  | 19.75  | 37.39  | 0.00   | 20.82  | 110.42 |
| Removal (%)                    |        |        |         |         |        |         | 10.39  | 66.76  | 71.06  | 95.07  | 81.05  | 61.95  | 82.42  | 96.48  | 100.00 | 88.08  | 93.20  |
| Ciprofloxacin (ng/L)           | 17.02  | 20.54  | 40.00   | 86.07   | 22.42  | 18.25   | 11.99  | 13.05  | 51.21  | 12.79  | 8.82   | 4.93   | 8.36   | 13.39  | 7.69   | 13.21  | 11.92  |
| Removal (%)                    |        |        |         |         |        |         | 29.56  | 36.46  | 40.50  | 29.91  | 60.67  | 71.02  | 59.33  | 66.53  | 91.07  | 41.10  | 34.70  |
| Citalopram (ng/L)              | 0.00   | 0.00   | 1496.89 | 859.85  | 101.43 | 1092.96 | 0.00   | 0.00   | 0.00   | 0.00   | 0.00   | 0.00   | 0.00   | 0.00   | 0.00   | 0.00   | 0.00   |
| Removal (%)                    |        |        |         |         |        |         |        |        | 100.00 | 100.00 | 100.00 |        |        | 100.00 | 100.00 | 100.00 | 100.00 |
| Diclofenac (ng/L)              | 0.00   | 0.00   | 398.99  | 278.80  | 146.43 | 879.64  | 0.00   | 0.00   | 205.96 | 0.00   | 0.00   | 0.00   | 0.00   | 0.00   | 84.26  | 85.46  | 0.00   |
| Removal (%)                    |        |        |         |         |        |         |        |        | 26.13  | 100.00 | 100.00 |        |        | 100.00 | 69.78  | 41.64  | 100.00 |
| Gabapentin (ng/L)              | 160.60 | 92.31  | 1456.20 | 1195.47 | 177.79 | 1505.68 | 51.57  | 0.00   | 225.72 | 45.45  | 44.48  | 69.90  | 75.91  | 40.26  | 109.77 | 83.60  | 60.50  |
| Removal (%)                    |        |        |         |         |        |         | 67.89  | 100.00 | 81.12  | 96.98  | 74.98  | 56.47  | 17.77  | 97.24  | 90.82  | 52.98  | 95.98  |
| Irbesartan (ng/L)              | 211.45 | 129.47 | 865.58  | 712.07  | 224.79 | 714.85  | 20.89  | 0.00   | 80.72  | 22.29  | 23.53  | 0.00   | 0.00   | 0.00   | 113.84 | 95.65  | 31.40  |
| Removal (%)                    |        |        |         |         |        |         | 90.12  | 100.00 | 88.66  | 96.88  | 89.53  | 100.00 | 100.00 | 100.00 | 84.01  | 57.45  | 95.61  |
| Losartan (ng/L)                | 149.87 | 122.39 | 701.78  | 619.49  | 276.67 | 561.43  | 75.84  | 35.13  | 480.17 | 101.26 | 97.23  | 44.59  | 54.16  | 35.83  | 220.19 | 240.56 | 94.74  |
| Removal (%)                    |        |        |         |         |        |         | 49.40  | 71.30  | 22.49  | 81.96  | 64.86  | 70.25  | 55.74  | 94.89  | 64.46  | 13.05  | 83.13  |
| Ofloxacin (ng/L)               | 21.02  | 13.23  | 42.04   | 60.79   | 13.48  | 40.38   | 13.45  | 12.65  | 38.92  | 8.68   | 7.18   | 12.36  | 13.00  | 11.75  | 14.50  | 9.06   | 10.23  |

|                         |        |        |         |         |        |         |        |        |         |        |        |        |        |        |        |        |        |
|-------------------------|--------|--------|---------|---------|--------|---------|--------|--------|---------|--------|--------|--------|--------|--------|--------|--------|--------|
| Removal (%)             |        |        |         |         |        |         | 35.99  | 4.44   | 35.97   | 78.50  | 46.74  | 41.20  | 1.77   | 72.05  | 76.14  | 32.74  | 74.66  |
| Propranolol (ng/L)      | 1.30   | 0.86   | 20.14   | 10.53   | 1.33   | 8.65    | 0.00   | 0.00   | 0.00    | 0.00   | 0.00   | 0.00   | 0.00   | 0.00   | 0.00   | 0.00   | 0.00   |
| Removal (%)             |        |        |         |         |        |         | 100.00 | 100.00 | 100.00  | 100.00 | 100.00 | 100.00 | 100.00 | 100.00 | 100.00 | 100.00 | 100.00 |
| Sertraline (ng/L)       | 0.00   | 0.00   | 0.00    | 0.00    | 0.00   | 21.79   | 0.00   | 0.00   | 0.00    | 0.00   | 0.00   | 0.00   | 0.00   | 0.00   | 0.00   | 0.00   | 0.00   |
| Removal (%)             |        |        |         |         |        |         |        |        |         | 100.00 |        |        |        |        |        |        | 100.00 |
| Sulfamethoxazole (ng/L) | 0.00   | 0.00   | 47.01   |         | 34.93  | 15.75   | 0.00   | 0.00   | 0.00    | 0.00   | 0.00   | 0.00   | 0.00   | 0.00   | 0.00   | 0.00   | 0.00   |
| Removal (%)             |        |        |         |         |        |         |        |        |         | 100.00 | 100.00 |        |        | 100.00 |        | 100.00 | 100.00 |
| Sulfapyridin (ng/L)     | 0.00   | 0.00   | 313.62  | 236.46  | 72.21  | 224.80  | 0.00   | 0.00   | 0.00    | 0.00   | 0.00   | 0.00   | 0.00   | 0.00   | 0.00   | 0.00   | 0.00   |
| Removal (%)             |        |        |         |         |        |         |        |        | 100.00  | 100.00 | 100.00 |        |        | 100.00 | 100.00 | 100.00 | 100.00 |
| Trimethoprim (ng/L)     | 33.47  | 25.07  | 336.70  | 338.11  | 40.81  | 247.38  | 18.29  | 11.45  | 83.34   | 0.00   | 7.10   | 5.23   | 0.00   | 12.99  | 0.00   | 0.00   | 15.90  |
| Removal (%)             |        |        |         |         |        |         | 45.37  | 54.34  | 75.35   | 100.00 | 82.60  | 84.38  | 100.00 | 96.14  | 100.00 | 100.00 | 93.57  |
| Venlafaxine (ng/L)      | 190.49 | 140.74 | 2949.88 | 2660.98 | 257.68 | 2331.73 | 69.98  | 18.69  | 1369.05 | 74.71  | 76.05  | 51.27  | 18.70  | 61.16  | 165.69 | 177.39 | 96.37  |
| Removal (%)             |        |        |         |         |        |         | 63.26  | 86.72  | 48.55   | 96.80  | 70.49  | 73.09  | 86.71  | 97.93  | 93.77  | 31.16  | 95.87  |

(b)

| Collection Date                | 09-27  | 10-04  | 10-11  | 10-18  | 10-25  | 09-28  | 10-05  | 10-12  | 10-19  | 10-26  | 09-28  | 10-05  | 10-12  | 10-19  | 10-26  |
|--------------------------------|--------|--------|--------|--------|--------|--------|--------|--------|--------|--------|--------|--------|--------|--------|--------|
| Entrance / Line (Out)          | E      | E      | E      | E      | E      | L1     | L1     | L1     | L1     | L1     | L2     | L2     | L2     | L2     | L2     |
| Experiment                     | 2      | 2      | 2      | 2      | 2      | 2      | 2      | 2      | 2      | 2      | 2      | 2      | 2      | 2      | 2      |
| Alpha-Hydroxyalprazolam (ng/L) | 31.71  | 31.98  | 30.83  | 30.75  | 31.72  | 0.00   | 0.00   | 0.00   | 0.00   | 0.00   | 0.00   | 0.00   | 0.00   | 0.00   | 31.17  |
| Removal (%)                    |        |        |        |        |        | 100.00 | 100.00 | 100.00 | 100.00 | 100.00 | 100.00 | 100.00 | 100.00 | 100.00 | 1.71   |
| Atenolol (ng/L)                | 155.47 | 159.15 | 176.33 | 162.73 | 166.74 | 0.00   | 0.00   | 146.59 | 0.00   | 149.39 | 0.00   | 0.00   | 0.00   | 148.34 | 158.99 |
| Removal (%)                    |        |        |        |        |        | 100.00 | 100.00 | 16.86  | 100.00 | 10.40  | 100.00 | 100.00 | 100.00 | 8.84   | 4.65   |
| Azithromycin (ng/L)            | 0.00   | 0.00   | 92.58  | 0.00   | 104.12 | 0.00   | 0.00   | 0.00   | 0.00   | 0.00   | 0.00   | 0.00   | 0.00   | 0.00   | 0.00   |
| Removal (%)                    |        |        |        |        |        |        |        | 100.00 |        | 100.00 |        |        | 100.00 |        | 100.00 |
| Bezafibrate (ng/L)             | 92.04  | 187.85 | 125.85 | 105.71 | 77.71  | 0.00   | 0.00   | 0.00   | 0.00   | 56.98  | 0.00   | 0.00   | 0.00   | 0.00   | 72.17  |
| Removal (%)                    |        |        |        |        |        | 100.00 | 100.00 | 100.00 | 100.00 | 26.68  | 100.00 | 100.00 | 100.00 | 100.00 | 7.13   |
| Bisoprolol (ng/L)              | 123.43 | 166.17 | 159.29 | 123.69 | 134.40 | 0.00   | 0.00   | 81.36  | 0.00   | 69.26  | 0.00   | 0.00   | 0.00   | 0.00   | 92.85  |
| Removal (%)                    |        |        |        |        |        | 100.00 | 100.00 | 48.93  | 100.00 | 48.47  | 100.00 | 100.00 | 100.00 | 100.00 | 30.92  |
| Carbamazepine (ng/L)           | 127.92 | 174.07 | 138.88 | 136.66 | 162.99 | 59.17  | 28.32  | 86.35  | 69.74  | 70.65  | 20.02  | 15.10  | 38.16  | 63.27  | 140.44 |
| Removal (%)                    |        |        |        |        |        | 53.74  | 83.73  | 37.82  | 48.97  | 56.65  | 84.35  | 91.33  | 72.52  | 53.71  | 13.83  |
| Ciprofloxacin (ng/L)           | 21.97  | 22.90  | 13.38  | 20.01  | 21.43  | 6.51   | 9.31   | 10.61  | 5.37   | 7.40   | 9.56   | 8.58   | 8.81   | 6.82   | 11.21  |
| Removal (%)                    |        |        |        |        |        | 70.35  | 59.35  | 20.72  | 73.17  | 65.46  | 56.50  | 62.56  | 34.14  | 65.94  | 47.71  |
| Citalopram (ng/L)              | 105.55 | 233.06 | 146.98 | 138.37 | 160.90 | 0.00   | 0.00   | 20.62  | 0.00   | 0.00   | 0.00   | 0.00   | 0.00   | 30.42  | 74.29  |
| Removal (%)                    |        |        |        |        |        | 100.00 | 100.00 | 85.97  | 100.00 | 100.00 | 100.00 | 100.00 | 100.00 | 78.02  | 53.83  |
| Diclofenac (ng/L)              | 142.83 | 214.91 | 136.63 | 159.36 | 98.16  | 0.00   | 101.11 | 111.99 | 0.00   | 90.45  | 92.78  | 110.91 | 104.70 | 95.40  | 163.97 |
| Removal (%)                    |        |        |        |        |        | 100.00 | 52.95  | 18.04  | 100.00 | 7.86   | 35.04  | 48.39  | 23.37  | 40.14  | -67.04 |
| Gabapentin (ng/L)              | 263.77 | 147.84 | 356.95 | 275.81 | 149.60 | 44.99  | 98.39  | 88.26  | 87.86  | 150.31 | 90.37  | 138.48 | 109.42 | 126.87 | 158.27 |
| Removal (%)                    |        |        |        |        |        | 82.94  | 33.45  | 75.27  | 68.15  | -0.47  | 65.74  | 6.33   | 69.35  | 54.00  | -5.79  |
| Irbesartan (ng/L)              | 235.36 | 505.24 | 361.04 | 345.52 | 433.33 | 28.29  | 58.08  | 67.33  | 31.36  | 103.32 | 83.17  | 103.18 | 76.48  | 87.35  | 262.30 |
| Removal (%)                    |        |        |        |        |        | 87.98  | 88.50  | 81.35  | 90.92  | 76.16  | 64.66  | 79.58  | 78.82  | 74.72  | 39.47  |
| Losartan (ng/L)                | 237.92 | 361.98 | 344.38 | 383.34 | 294.04 | 43.80  | 116.98 | 213.09 | 74.77  | 125.06 | 150.94 | 191.53 | 188.41 | 198.74 | 273.44 |
| Removal (%)                    |        |        |        |        |        | 81.59  | 67.68  | 38.12  | 80.50  | 57.47  | 36.56  | 47.09  | 45.29  | 48.15  | 7.01   |
| Ofloxacin (ng/L)               | 10.84  | 9.16   | 9.12   | 15.52  | 17.95  | 4.06   | 5.70   | 8.45   | 6.29   | 6.20   | 7.76   | 6.54   | 5.71   | 6.68   | 8.31   |
| Removal (%)                    |        |        |        |        |        | 62.52  | 37.73  | 7.34   | 59.48  | 65.45  | 28.34  | 28.65  | 37.41  | 56.93  | 53.67  |
| Propranolol (ng/L)             | 2.17   | 3.06   | 2.44   | 2.30   | 3.00   | 0.00   | 0.00   | 0.00   | 0.00   | 0.00   | 0.00   | 0.00   | 0.00   | 0.00   | 0.83   |
| Removal (%)                    |        |        |        |        |        | 100.00 | 100.00 | 100.00 | 100.00 | 100.00 | 100.00 | 100.00 | 100.00 | 100.00 | 72.31  |
| Sertraline (ng/L)              | 0.00   | 21.79  | 18.35  | 0.00   | 0.00   | 0.00   | 0.00   | 0.00   | 0.00   | 0.00   | 0.00   | 0.00   | 0.00   | 0.00   | 0.00   |
| Removal (%)                    |        |        |        |        |        |        | 100.00 | 100.00 |        |        |        | 100.00 | 100.00 |        |        |

|                         |        |        |        |        |        |        |        |        |        |        |        |        |        |        |        |
|-------------------------|--------|--------|--------|--------|--------|--------|--------|--------|--------|--------|--------|--------|--------|--------|--------|
| Sulfamethoxazole (ng/L) | 10.15  | 17.78  | 15.20  | 8.74   | 8.66   | 0.00   | 0.00   | 0.00   | 0.00   | 0.00   | 0.00   | 0.00   | 0.00   | 0.00   | 0.00   |
| Removal (%)             |        |        |        |        |        | 100.00 | 100.00 | 100.00 | 100.00 | 100.00 | 100.00 | 100.00 | 100.00 | 100.00 | 100.00 |
| Sulfapyridin (ng/L)     | 24.90  | 65.21  | 38.32  | 0.00   | 18.75  | 0.00   | 0.00   | 5.57   | 0.00   | 0.00   | 0.00   | 0.00   | 0.00   | 4.22   | 10.08  |
| Removal (%)             |        |        |        |        |        | 100.00 | 100.00 | 85.46  |        | 100.00 | 100.00 | 100.00 | 100.00 |        | 46.24  |
| Trimethoprim (ng/L)     | 21.96  | 60.11  | 46.63  | 20.52  | 37.68  | 7.19   | 0.00   | 9.04   | 0.00   | 11.09  | 0.00   | 0.00   | 0.00   | 8.90   | 26.47  |
| Removal (%)             |        |        |        |        |        | 67.25  | 100.00 | 80.61  | 100.00 | 70.58  | 100.00 | 100.00 | 100.00 | 56.65  | 29.74  |
| Venlafaxine (ng/L)      | 198.34 | 248.13 | 199.93 | 193.06 | 173.51 | 97.33  | 144.73 | 82.33  | 90.76  | 116.21 | 137.23 | 153.30 | 100.12 | 119.86 | 143.64 |
| Removal (%)             |        |        |        |        |        | 50.93  | 41.67  | 58.82  | 52.99  | 33.03  | 30.81  | 38.22  | 49.92  | 37.92  | 17.21  |

Table S3. Chemical oxygen demand (COD) and nutrients concentration (mg L<sup>-1</sup>) in the inflow water of the microalgal photobioreactors.

| Time (days) | Experiment 1 |                 |                 |      |     | Experiment 2 |                 |                 |      |     |
|-------------|--------------|-----------------|-----------------|------|-----|--------------|-----------------|-----------------|------|-----|
|             | COD          | NH <sub>4</sub> | NO <sub>3</sub> | TN   | TP  | COD          | NH <sub>4</sub> | NO <sub>3</sub> | TN   | TP  |
| 0           | n.d.         | 42.5            | 4.9             | 30.0 | 7.4 | n.d.         | 33.0            | 25.5            | 82.0 | 3.3 |
| 7           | 21.0         | 49.0            | n.d.            | 42.3 | 2.7 | n.d.         | 36.0            | 24.3            | 89.0 | 0.7 |
| 14          | 108          | 7.6             | 5.5             | 40.5 | 3.7 | 111          | 27.0            | 24.7            | 5.5  | 0.1 |
| 21          | 151          | 1.3             | 7.2             | 34.7 | 3.7 | n.d.         | 24.5            | 24.6            | 2.5  | 1.7 |
| 28          | 135          | 38.4            | 6.8             | 34.0 | 0.8 | 150          | 3.5             | n.d.            | n.d. | 1.5 |

COD – Chemical oxygen demand, NH<sub>4</sub> – Ammonium, NO<sub>3</sub> – Nitrate, TN – Total nitrogen, TP – Total phosphorous
